# Supplementary material for: Urine and Fecal 1H-NMR Metabolomes Differ Significantly between Pre-Term and Full-Term Born Physically Fit Healthy Adult Males
Source: MDPI journal article supplement (doi:10.3390/metabo12060536), 2022-06-10
Supplement: s1 [file s1]

# Electronic Supplementary Material

## Urine and fecal <sup>1</sup>H-NMR metabolomes differ significantly between pre-term and full-term born physically fit healthy adult males

Leon Deutsch <sup>1</sup>, Tadej Debevec <sup>2,3</sup>, Gregoire P. Millet <sup>2,4</sup>, Damjan Osredkar <sup>5,6</sup>, Simona Opara<sup>1</sup>, Robert Šket<sup>7</sup>, Boštjan Murovec<sup>8</sup>, Minca Mramor<sup>9</sup>, Janez Plavec<sup>10</sup> and Blaz Stres <sup>1,3,11\*</sup>

<sup>1</sup> University of Ljubljana, Biotechnical Faculty, Department of Animal Science, Ljubljana, Slovenia; leon.deutsch@bf.uni-lj.si

<sup>2</sup> Faculty of Sports, University of Ljubljana, Ljubljana, Slovenia. tadej.debevec@fsp.uni-lj.si

<sup>3</sup> Jožef Stefan Institute, Department of Automation, Biocybernetics and Robotics, Ljubljana, Slovenia

<sup>4</sup> Institute of Sport Sciences, University of Lausanne, Lausanne, Switzerland. gregoire.millet@unil.ch

<sup>5</sup> Department of Pediatric Neurology, University Children's Hospital, University Medical Centre Ljubljana, Slovenia; damjan.osredkar@kclj.si

<sup>6</sup> Faculty of Medicine, University of Ljubljana, Slovenia

<sup>7</sup> Institute for Special Laboratory Diagnostics, University Medical Centre Ljubljana, University Children's Hospital, Ljubljana, Slovenia

<sup>8</sup> University of Ljubljana, Faculty of electrical engineering, Jamova 2, SI-1000 Ljubljana; bostjan.murovec@fe.uni-lj.si

<sup>9</sup> Department of Infectious diseases, University Medical Centre Ljubljana, Slovenia; minca.mramore@kclj.si

<sup>10</sup> National Institute of Chemistry, NMR Center, Ljubljana, Slovenia; janez.plavec@ki.si

<sup>11</sup> University of Ljubljana, Faculty of Civil and Geodetic Engineering, Institute of Sanitary Engineering, Ljubljana, Slovenia

\* Correspondence: blaz.stres@bf.uni-lj.si; Tel.: +38641567633

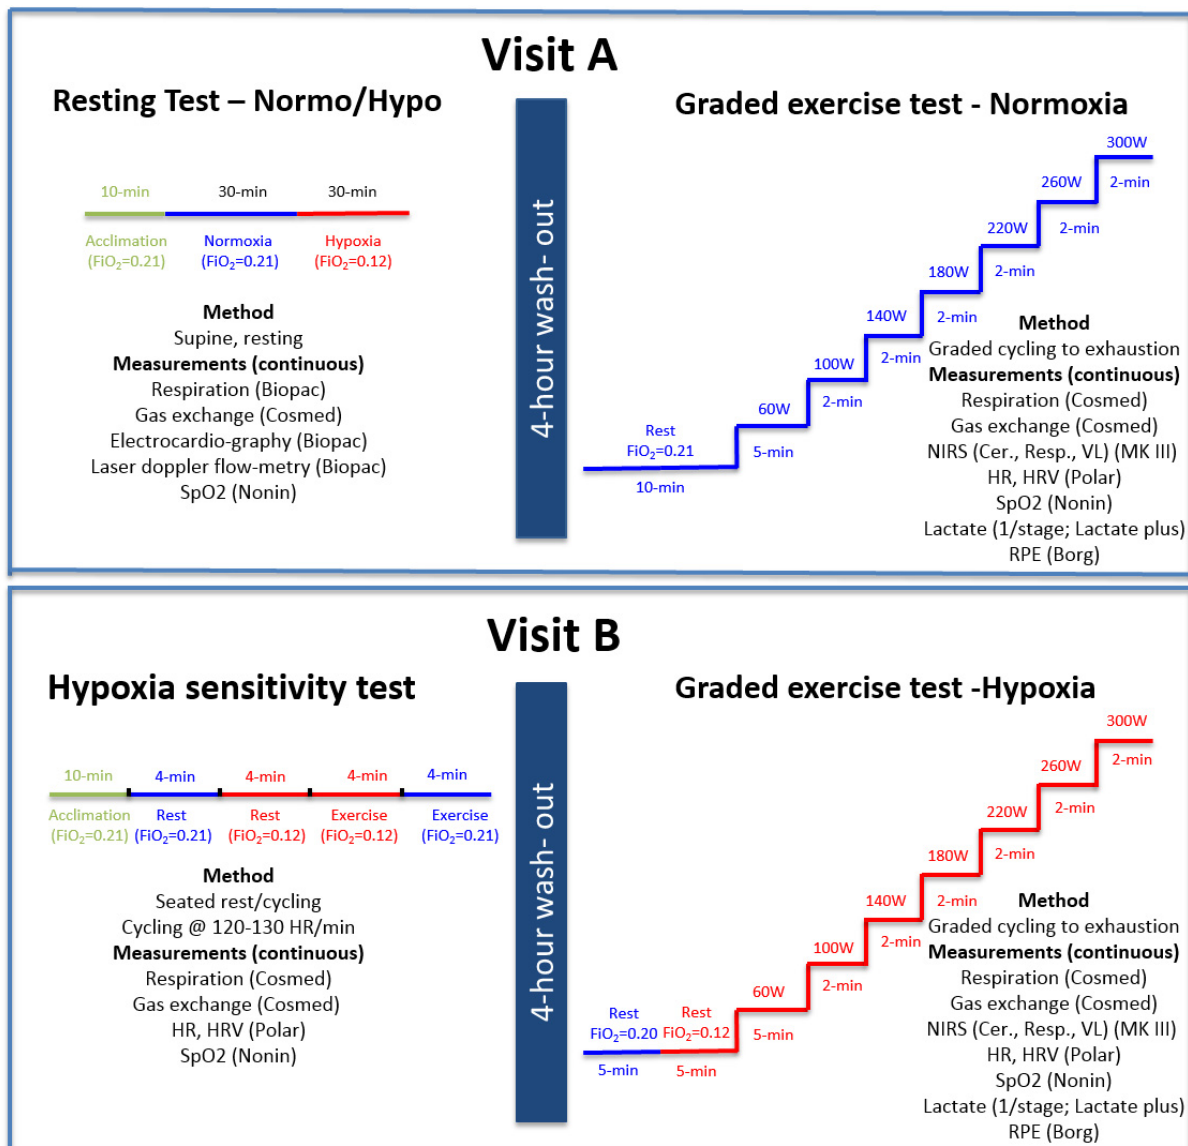

Figure S1: The outline of the PreTerm project. The participants visited the lab on two occasions in a randomised fashion (i.e. visit A & visit B). Collectively, they performed four tests:

- 1) **Resting normo/hypo test** - this was suggested by our colleagues from the Medical faculty to assess different physiological parameters during resting state in normoxia and hypoxia.
- 2) **Hypoxia sensitivity test** (i.e. Richalet test) to assess hypoxia sensitivity and derive HVR.
- 3) **Graded exercise test in normoxia**
- 4) **Graded exercise test in hypoxia**

Both graded exercise tests have a relatively gradual power increases (40W/4 min). The participants were blinded (as to normo/hypo) during all tests [1,2].

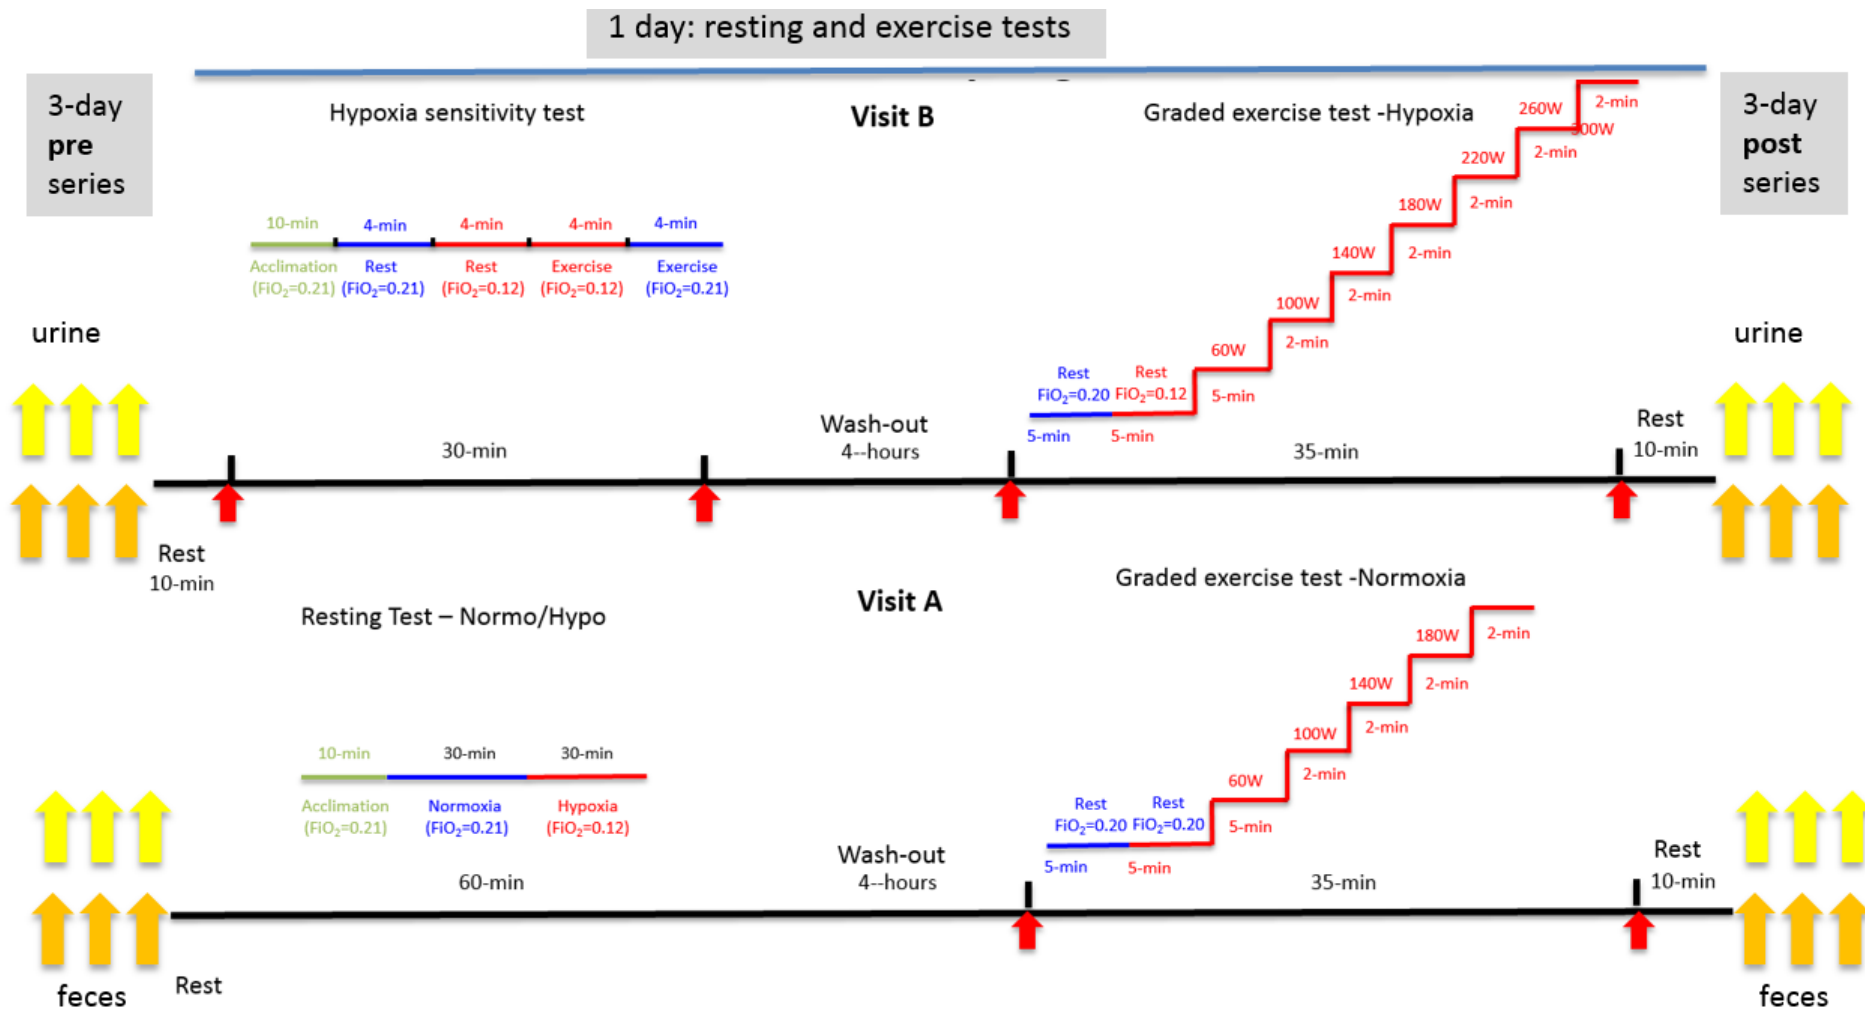

Figure S2: Sampling procedures of the PreTerm project. The inset designates the detailed procedures utilized for analyses of air and blood samples reported before [1,2]. In this study focused on the 3-day series before and after resting and exercise tests in normoxia and hypoxia.

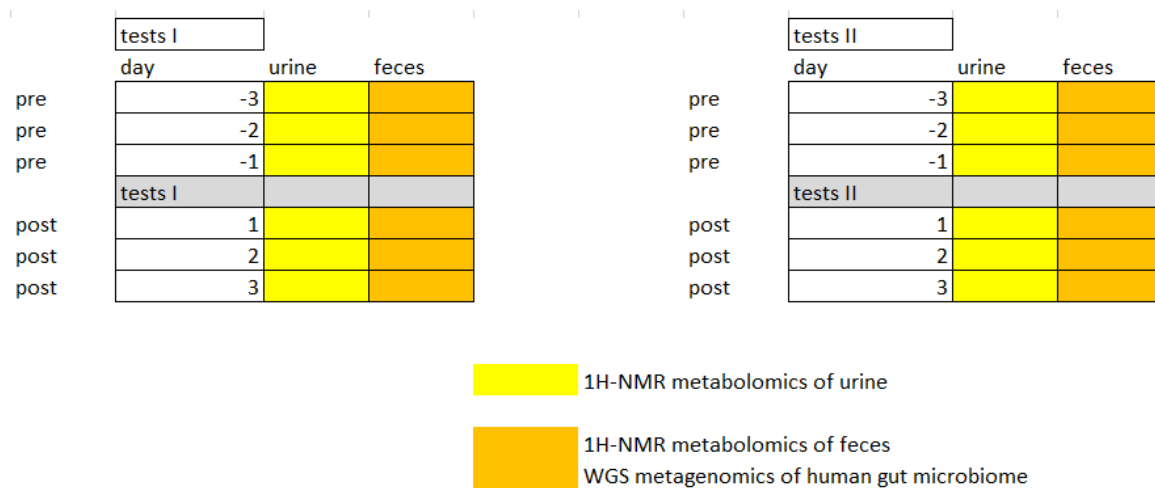

Figure S3: Schematic representation of 3-day sampling series utilized in this study to detected significant differences in the measured metabolomics and metagenomics datasets collected from urine and fecal samples. Every participant collected 12 fecal and 12 urine samples (three before and three after normoxic tests, next to additional three before and three after hypoxic tests).

|                                                            |                       | Control | Preterm | Observed changes |
|------------------------------------------------------------|-----------------------|---------|---------|------------------|
| <div>Physiology</div> <div>NMR</div> <div>Microbiome</div> | Exercise/Rest         |         |         |                  |
|                                                            | Urine                 |         |         |                  |
|                                                            | Feces                 |         |         |                  |
|                                                            | Taxonomy              |         |         |                  |
|                                                            | Functional genes      |         |         |                  |
|                                                            | Enzymatic reactions   |         |         |                  |
|                                                            | Metabolic pathways    |         |         |                  |
|                                                            | Predicted metabolites |         |         |                  |

Figure S4: A schematic representation of the explored data matrices between the two groups of participants.

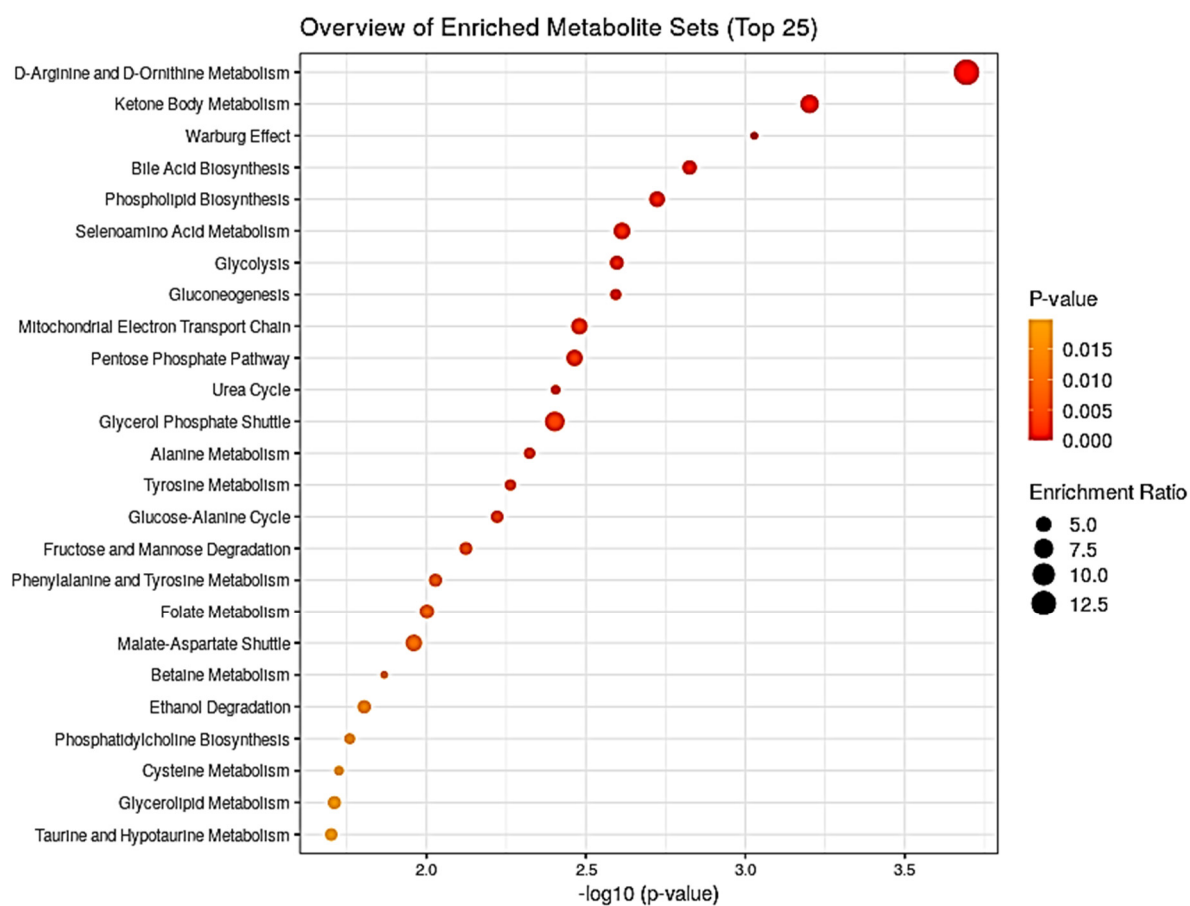

Figure S5: The most enriched metabolic pathways associated with metabolism based on urinary metabolomes.

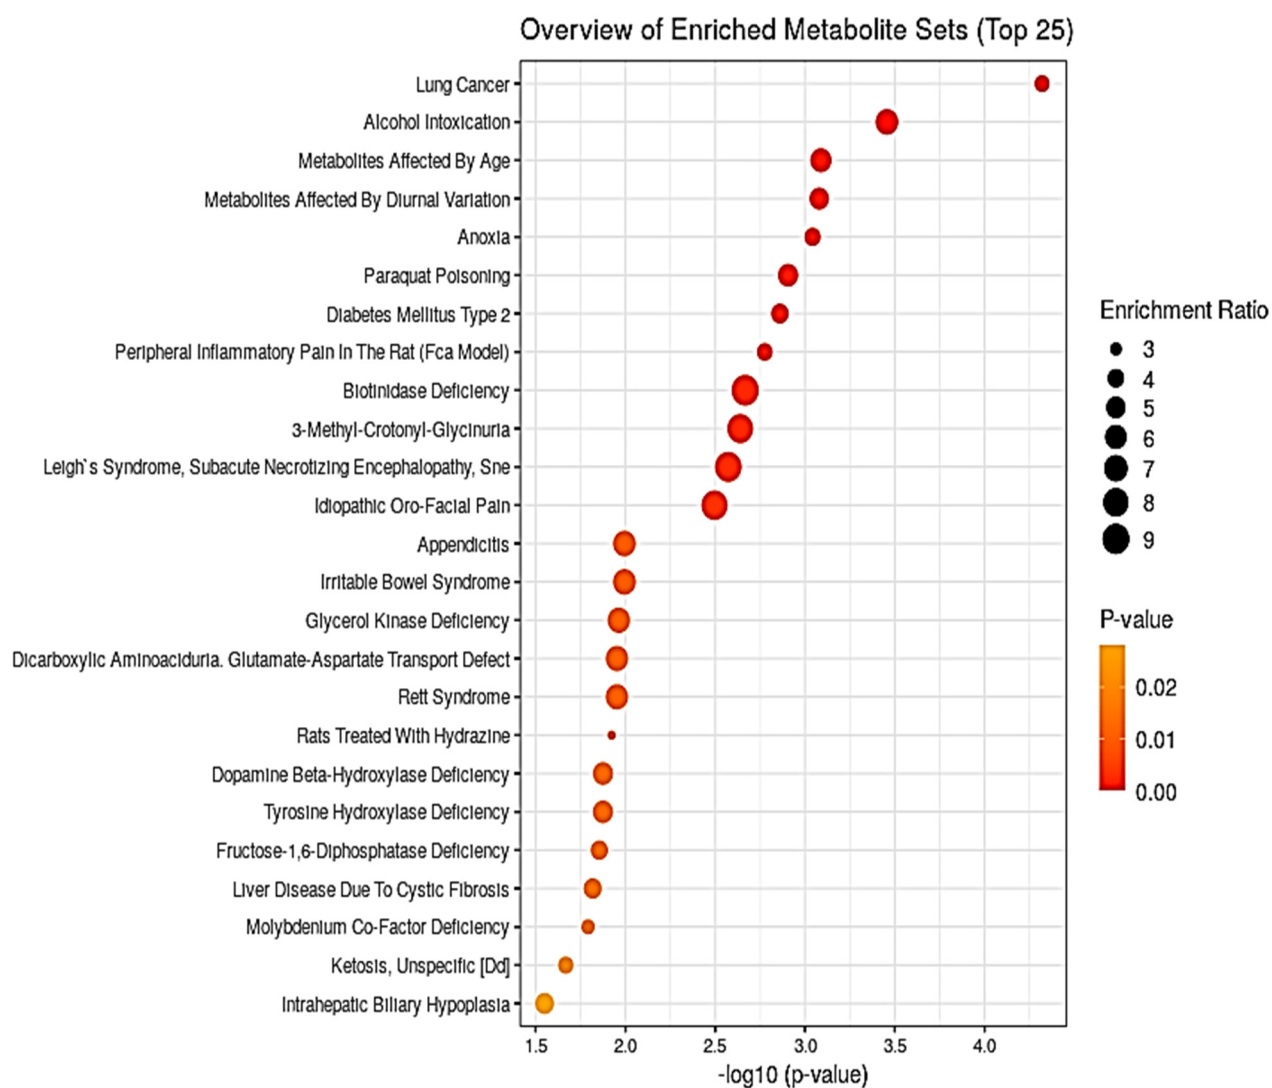

Figure S6: The most enriched metabolic pathways associated with disease based on urinary metabolomes.

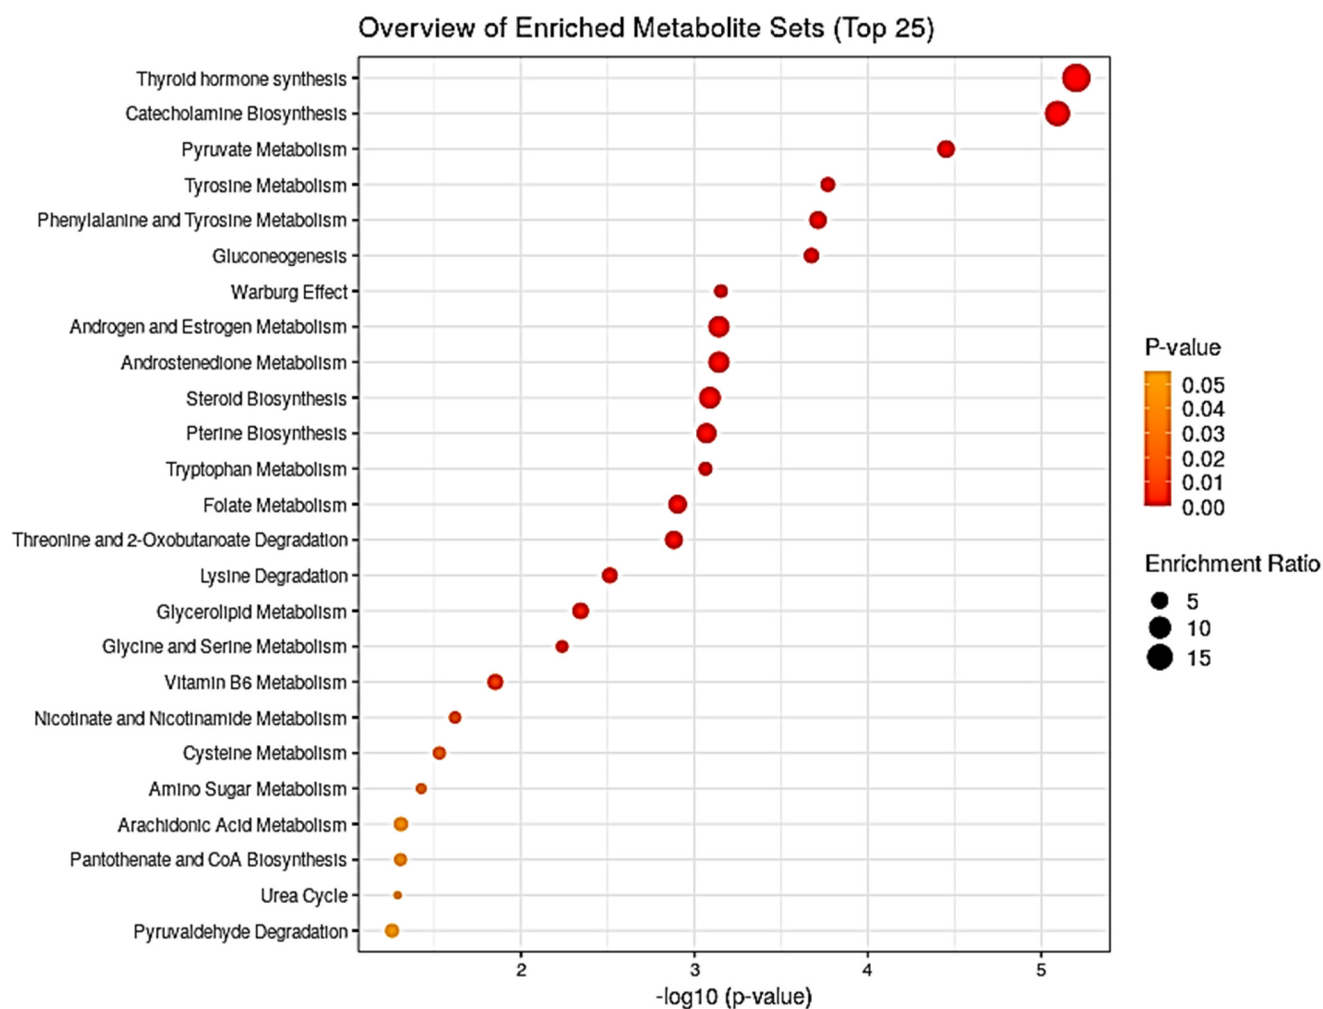

Figure S7: The most enriched metabolic pathways associated with metabolism based on fecal metabolomes.



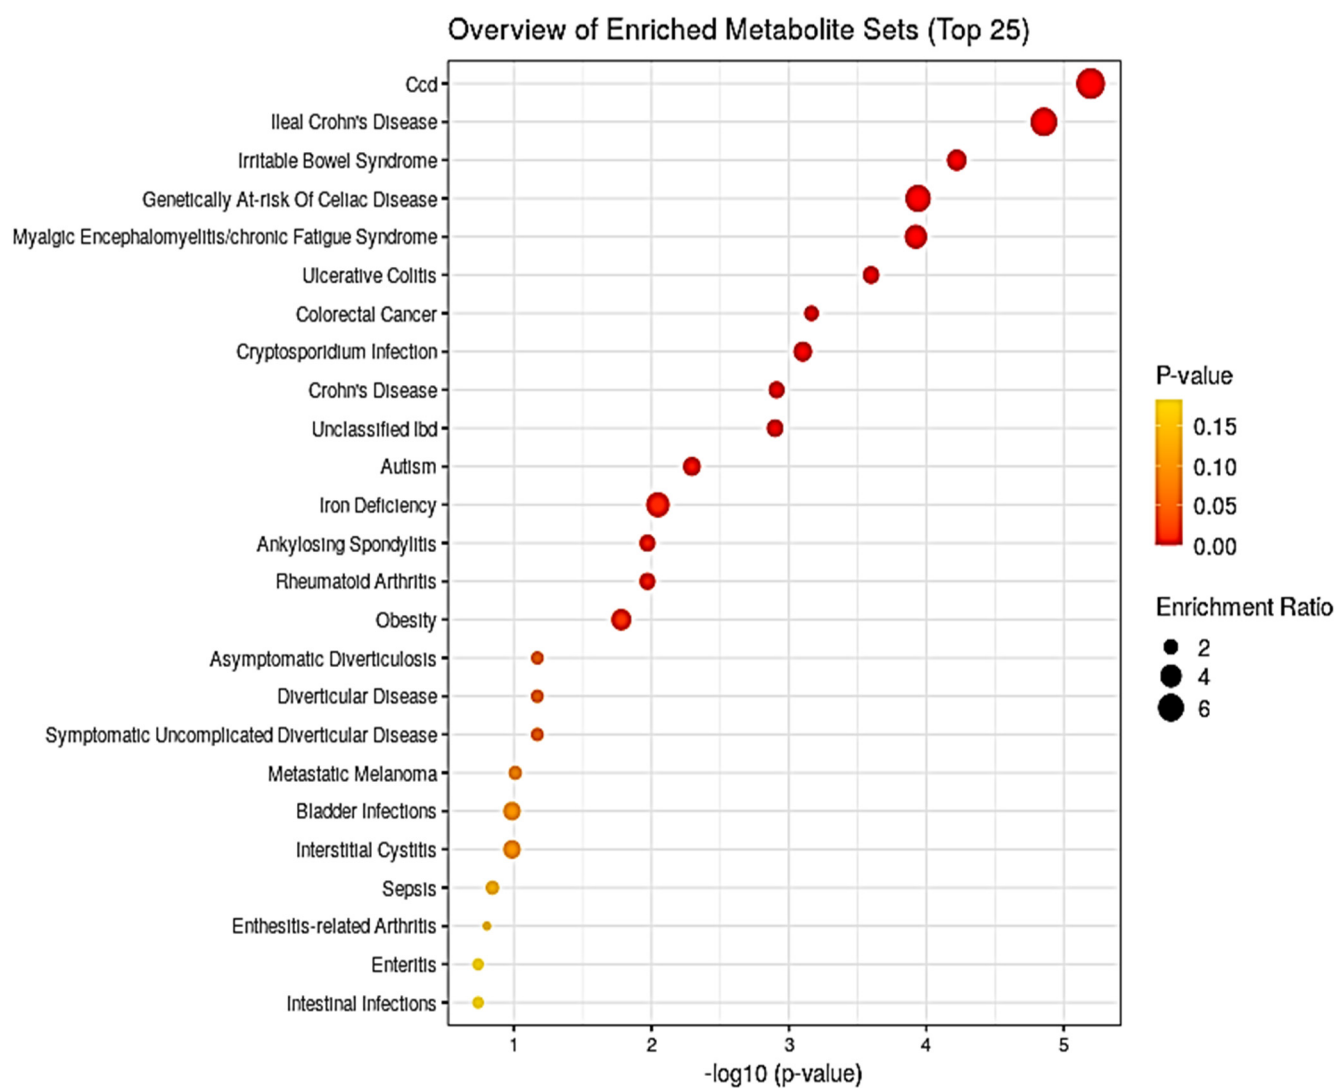

Figure S8: The most enriched metabolic pathways associated with disease based on fecal metabolomes.

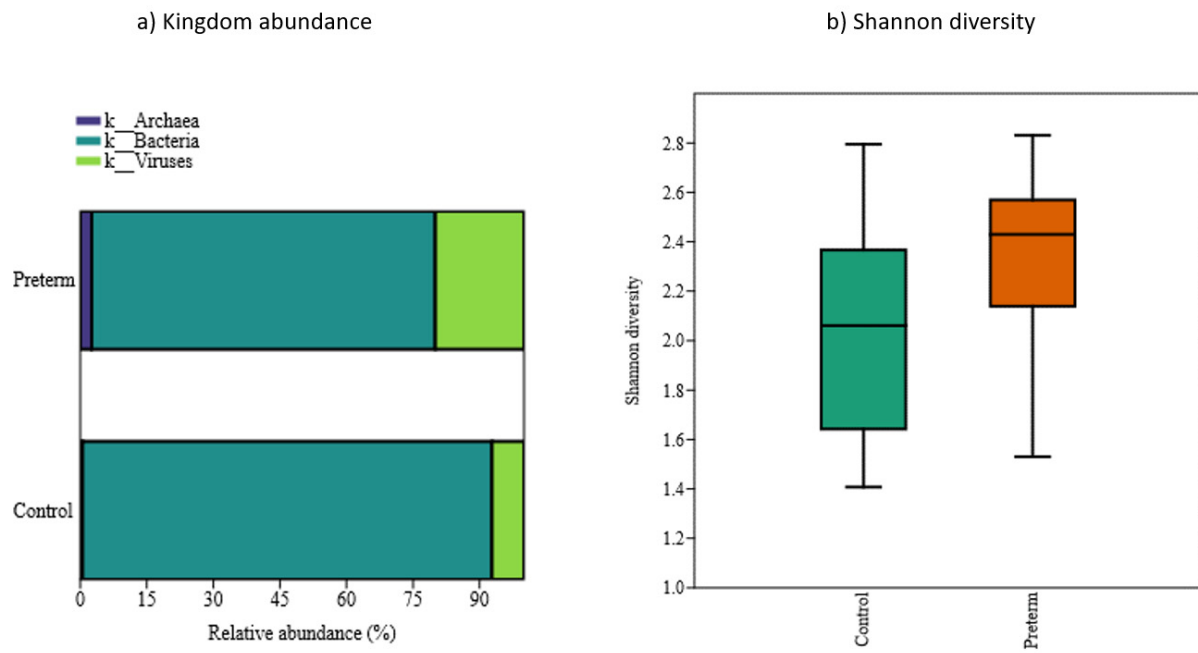

Figure S9. Abundance of three different kingdoms in preterm and full term group based on fecal metagenomics (a). Shannon diversity was significantly increased in Preterm group (b).

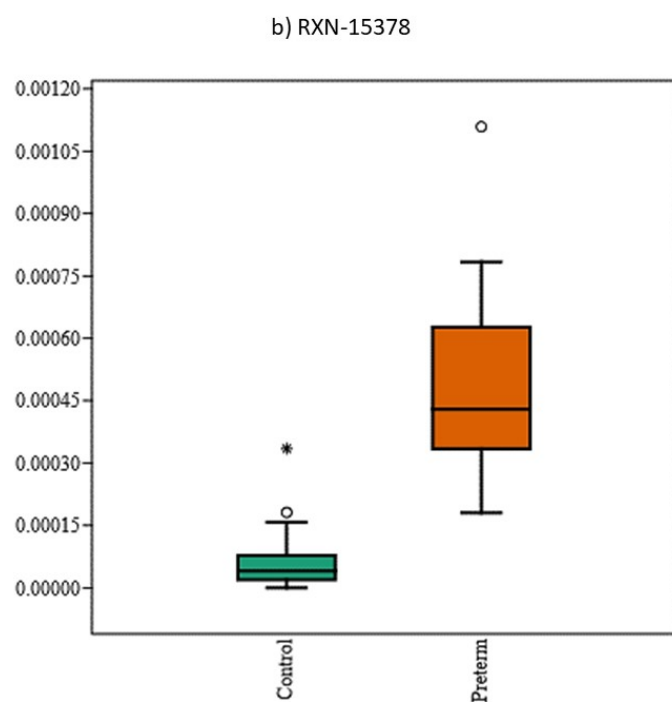

Figure S10. Box plots presenting the relative abundance of RXN-15378 in preterm (orange) and control (group). This enzymatic reaction is involved in the production of succinate.

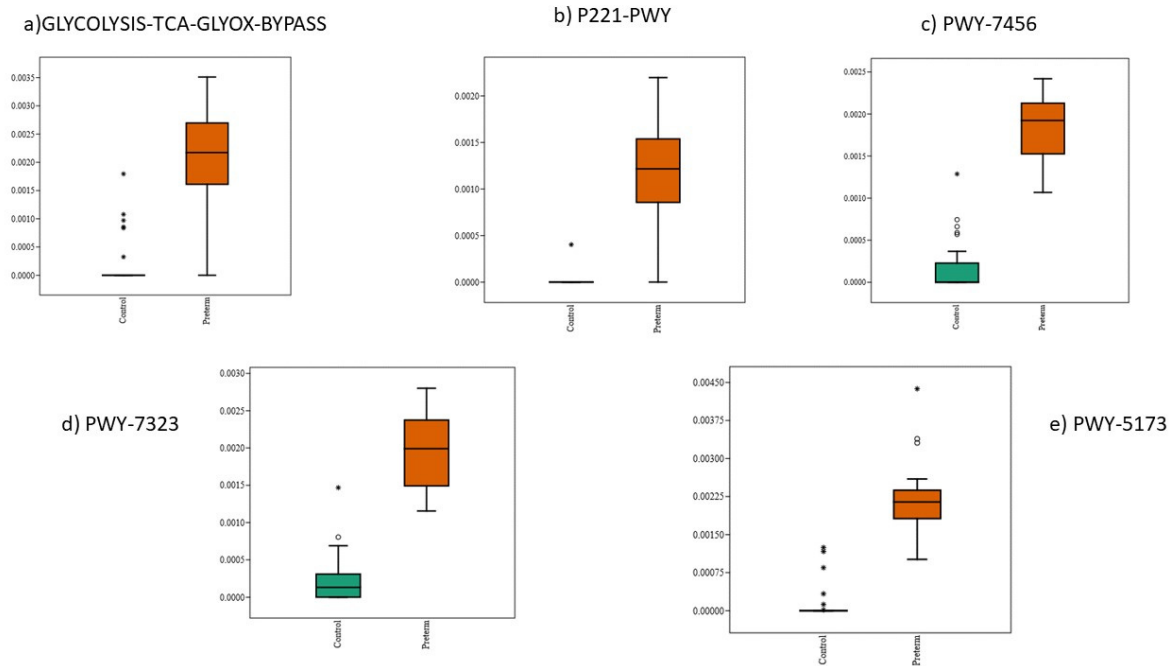

Figure S11. Selected metabolic pathways for differentiation of preterm (orange= and control (green) group.

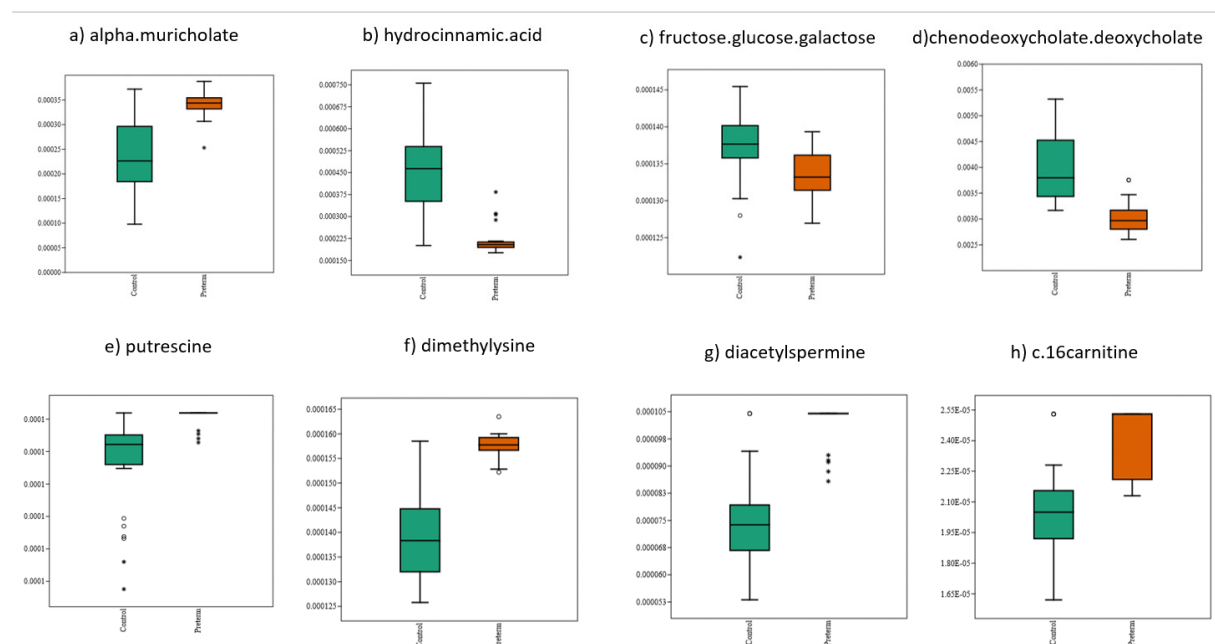

Figure S12. Selected predicted metabolites associated with human gut microbiota in control (green) and preterm (orange) groups.

|                                                            |                       | Control | Preterm | Observed changes                                                                                    |
|------------------------------------------------------------|-----------------------|---------|---------|-----------------------------------------------------------------------------------------------------|
| <div>Physiology</div> <div>NMR</div> <div>Microbiome</div> | Exercise/Rest         | ●       | ▲       | Preterm significantly different from full-term and different responses to rest and some to exercise |
|                                                            | Urine                 | ●       | ▲       | Preterm significantly different from full-term at the level of urine metabolomes                    |
|                                                            | Feces                 | ●       | ▲       | Preterm significantly different from full-term at the level of fecal metabolomes                    |
|                                                            | Taxonomy              | ●       | ●       | No characteristic change in microbiome taxonomy                                                     |
|                                                            | Functional genes      | ●       | ●       | No characteristic change in microbiome functional genes                                             |
|                                                            | Enzymatic reactions   | ●       | ▲       | Distinct use of enzymatic reactions                                                                 |
|                                                            | Metabolic pathways    | ●       | ▲       | Distinct use of metabolic pathways                                                                  |
|                                                            | Predicted metabolites | ●       | ▲       | Distinct use of predicted metabolites                                                               |

Figure S13: A summary of observed changes at various information levels showing that significant differences exist between the preterm and full-term adult urine metabolomes, fecal metabolomes and microbial metabolic reactions and pathways. Taken together, these results show that host and its microbiome behave measurably different in healthy physically fit young males in comparison to matched full-term controls.

Table S1. Baseline characteristics of PreTerm project participants [2].

| Variable                                                     | Full-term ( <i>n</i> = 15) |    | Pre-term ( <i>n</i> = 22) |    |
|--------------------------------------------------------------|----------------------------|----|---------------------------|----|
|                                                              | Mean                       | SD | Mean                      | SD |
| Age (years)                                                  | 22                         | 2  | 21                        | 2  |
| Body mass (kg)                                               | 73                         | 6  | 69                        | 7  |
| Height (cm)                                                  | 180                        | 5  | 175***                    | 7  |
| BMI (kg.m <sup>-2</sup> )                                    | 23                         | 2  | 23                        | 3  |
| Gestational age (weeks)                                      | 39                         | 2  | 29***                     | 3  |
| $\dot{V}O_{2\max}$ (mL.kg <sup>-1</sup> .min <sup>-1</sup> ) | 52                         | 5  | 48                        | 6  |

Table S2. The number of detected urine and fecal metabolites comparing full-term and preterm participants of the PreTerm study. Numbers in bold represent the observed albeit not significant differences in the number of metabolites within the preterm group between the Before-Hyp and After-Norm, and call for further exploration of potentially larger adaptability of preterm participants to oxidative challenges.

|       |         | TERM   |       |        |       | Preterm      |       |        |              |
|-------|---------|--------|-------|--------|-------|--------------|-------|--------|--------------|
|       |         | Hyp    |       | Nor    |       | Hyp          |       | Nor    |              |
|       |         | Before | After | Before | After | Before       | After | Before | After        |
| urine | Average | 132.1  | 139.8 | 138.9  | 132.0 | <b>121.7</b> | 116.7 | 127.2  | <b>139.5</b> |
|       | SD      | 30.6   | 15.7  | 15.7   | 27.4  | <b>32.7</b>  | 36.5  | 39.1   | <b>25.6</b>  |
| feces | Average | 82.3   | 78.2  | 80.8   | 81.2  | <b>81.9</b>  | 84.1  | 82.5   | <b>89.5</b>  |
|       | SD      | 20.7   | 29.9  | 23.8   | 21.2  | <b>21.0</b>  | 21.2  | 23.0   | <b>11.9</b>  |

Table S3. Detected metabolic pathways in urine.

| Metabolic pathway                      | Total Cmpd | Hits | Statistic Q | Expected Q | Raw p    | Holm p  | FDR      |
|----------------------------------------|------------|------|-------------|------------|----------|---------|----------|
| D-Arginine and D-Ornithine Metabolism  | 11         | 1    | 6.95670     | 0.51813    | 0.00020  | 0.01943 | 0.01943  |
| Ketone Body Metabolism                 | 13         | 4    | 3.61810     | 0.51813    | 0.00063  | 0.05972 | 0.03000  |
| Warburg Effect                         | 58         | 17   | 1.69810     | 0.51813    | 0.00094  | 0.08812 | 0.03000  |
| Bile Acid Biosynthesis                 | 65         | 7    | 2.44720     | 0.51813    | 0.00150  | 0.13909 | 0.03059  |
| Phospholipid Biosynthesis              | 29         | 4    | 2.79900     | 0.51813    | 0.00189  | 0.17399 | 0.03059  |
| Selenoamino Acid Metabolism            | 28         | 5    | 3.08090     | 0.51813    | 0.00244  | 0.22175 | 0.03059  |
| Glycolysis                             | 25         | 8    | 2.35670     | 0.51813    | 0.00253  | 0.22768 | 0.03059  |
| Gluconeogenesis                        | 35         | 12   | 1.91410     | 0.51813    | 0.00255  | 0.22768 | 0.03059  |
| Mitochondrial Electron Transport Chain | 19         | 5    | 2.97400     | 0.51813    | 0.00331  | 0.29169 | 0.03168  |
| Pentose Phosphate Pathway              | 29         | 5    | 2.98080     | 0.51813    | 0.00343  | 0.29864 | 0.03168  |
| Urea Cycle                             | 29         | 12   | 1.76740     | 0.51813    | 0.00393  | 0.33830 | 0.03168  |
| Glycerol Phosphate Shuttle             | 11         | 2    | 4.09630     | 0.51813    | 0.00396  | 0.33830 | 0.03168  |
| Alanine Metabolism                     | 17         | 8    | 1.93380     | 0.51813    | 0.00475  | 0.39897 | 0.03507  |
| Tyrosine Metabolism                    | 72         | 16   | 1.91970     | 0.51813    | 0.00545  | 0.45266 | 0.03740  |
| Glucose-Alanine Cycle                  | 13         | 6    | 2.07490     | 0.51813    | 0.00600  | 0.49220 | 0.03842  |
| Fructose and Mannose Degradation       | 32         | 9    | 2.13370     | 0.51813    | 0.00752  | 0.60933 | 0.04514  |
| Phenylalanine and Tyrosine Metabolism  | 28         | 7    | 2.18100     | 0.51813    | 0.00937  | 0.74969 | 0.05292  |
| Folate Metabolism                      | 29         | 5    | 2.47720     | 0.51813    | 0.00997  | 0.78750 | 0.05317  |
| Malate-Aspartate Shuttle               | 10         | 4    | 3.00320     | 0.51813    | 0.01096  | 0.85471 | 0.05537  |
| Betaine Metabolism                     | 21         | 9    | 1.69700     | 0.51813    | 0.01356  | 1.00000 | 0.06511  |
| Ethanol Degradation                    | 19         | 4    | 2.2121      | 0.51813    | 0.015674 | 1       | 0.071652 |
| Phosphatidylcholine Biosynthesis       | 14         | 6    | 1.85930     | 0.51813    | 0.01740  | 1.00000 | 0.07593  |
| Cysteine Metabolism                    | 26         | 7    | 1.76290     | 0.51813    | 0.01881  | 1.00000 | 0.07638  |
| Glycerolipid Metabolism                | 25         | 5    | 2.16140     | 0.51813    | 0.01944  | 1.00000 | 0.07638  |
| Taurine and Hypotaurine Metabolism     | 12         | 2    | 2.08390     | 0.51813    | 0.01989  | 1.00000 | 0.07638  |
| Nucleotide Sugars Metabolism           | 20         | 9    | 1.32390     | 0.51813    | 0.02630  | 1.00000 | 0.09573  |
| Phosphatidylethanolamine Biosynthesis  | 12         | 4    | 1.92190     | 0.51813    | 0.02783  | 1.00000 | 0.09573  |
| Glutamate Metabolism                   | 49         | 16   | 1.17350     | 0.51813    | 0.02792  | 1.00000 | 0.09573  |
| Arginine and Proline Metabolism        | 53         | 16   | 1.13860     | 0.51813    | 0.03285  | 1.00000 | 0.10875  |
| Glycine and Serine Metabolism          | 59         | 25   | 0.96882     | 0.51813    | 0.03446  | 1.00000 | 0.11028  |
| Aspartate Metabolism                   | 35         | 13   | 1.15460     | 0.51813    | 0.03804  | 1.00000 | 0.11779  |
| Methionine Metabolism                  | 43         | 15   | 1.07280     | 0.51813    | 0.04148  | 1.00000 | 0.12007  |
| Citric Acid Cycle                      | 32         | 12   | 1.15480     | 0.51813    | 0.04472  | 1.00000 | 0.12007  |
| Butyrate Metabolism                    | 19         | 5    | 1.56920     | 0.51813    | 0.04486  | 1.00000 | 0.12007  |
| Amino Sugar Metabolism                 | 33         | 9    | 1.10770     | 0.51813    | 0.04614  | 1.00000 | 0.12007  |
| Tryptophan Metabolism                  | 60         | 19   | 1.25150     | 0.51813    | 0.04728  | 1.00000 | 0.12007  |
| Ammonia Recycling                      | 32         | 13   | 1.07160     | 0.51813    | 0.04730  | 1.00000 | 0.12007  |
| Lysine Degradation                     | 30         | 6    | 1.29900     | 0.51813    | 0.04753  | 1.00000 | 0.12007  |



Table S4. Detected metabolic pathways and urine related diseases.

| Disease                                                          | Total Cmpd | Hits | Statistic Q | Expected Q | Raw p   | Holm p  | FDR     |
|------------------------------------------------------------------|------------|------|-------------|------------|---------|---------|---------|
| Lung Cancer                                                      | 32         | 29   | 1.85450     | 0.51813    | 0.00005 | 0.01100 | 0.01100 |
| Alcohol Intoxication                                             | 4          | 4    | 3.38020     | 0.51813    | 0.00035 | 0.08007 | 0.04021 |
| Metabolites Affected By Age                                      | 12         | 12   | 3.00170     | 0.51813    | 0.00082 | 0.18596 | 0.04175 |
| Metabolites Affected By Diurnal Variation                        | 6          | 6    | 2.62390     | 0.51813    | 0.00083 | 0.18898 | 0.04175 |
| Anoxia                                                           | 9          | 8    | 2.02080     | 0.51813    | 0.00091 | 0.20511 | 0.04175 |
| Paraquat Poisoning                                               | 7          | 7    | 2.77860     | 0.51813    | 0.00124 | 0.27933 | 0.04530 |
| Diabetes Mellitus Type 2                                         | 12         | 8    | 2.26770     | 0.51813    | 0.00138 | 0.30880 | 0.04530 |
| Peripheral Inflammatory Pain In The Rat (Fca Model)              | 10         | 9    | 1.95070     | 0.51813    | 0.00168 | 0.37355 | 0.04816 |
| Biotinidase Deficiency                                           | 3          | 1    | 4.79750     | 0.51813    | 0.00215 | 0.47780 | 0.05275 |
| 3-Methyl-Crotonyl-Glycinuria                                     | 4          | 2    | 4.31570     | 0.51813    | 0.00229 | 0.50687 | 0.05275 |
| Leigh`s Syndrome Subacute Necrotizing Encephalopathy             | 1          | 1    | 4.59970     | 0.51813    | 0.00267 | 0.58831 | 0.05591 |
| Idiopathic Oro-Facial Pain                                       | 2          | 1    | 4.43930     | 0.51813    | 0.00319 | 0.69846 | 0.06113 |
| Appendicitis                                                     | 1          | 1    | 3.39420     | 0.51813    | 0.01013 | 1.00000 | 0.15084 |
| Irritable Bowel Syndrome                                         | 1          | 1    | 3.39420     | 0.51813    | 0.01013 | 1.00000 | 0.15084 |
| Glycerol Kinase Deficiency                                       | 1          | 1    | 3.32930     | 0.51813    | 0.01088 | 1.00000 | 0.15084 |
| Dicarboxylic Aminoaciduria. Glutamate-Aspartate Transport Defect | 3          | 1    | 3.30770     | 0.51813    | 0.01115 | 1.00000 | 0.15084 |
| Rett Syndrome                                                    | 2          | 1    | 3.30770     | 0.51813    | 0.01115 | 1.00000 | 0.15084 |
| Rats Treated With Hydrazine                                      | 9          | 9    | 1.45000     | 0.51813    | 0.01193 | 1.00000 | 0.15248 |
| Dopamine Beta-Hydroxylase Deficiency                             | 5          | 2    | 2.77010     | 0.51813    | 0.01334 | 1.00000 | 0.15298 |
| Tyrosine Hydroxylase Deficiency                                  | 3          | 2    | 2.77010     | 0.51813    | 0.01334 | 1.00000 | 0.15298 |

Table S5. Detected metabolic pathways in feces.

| Metabolic pathway                        | Total Cmpd | Hits | Statistic Q | Expected Q | Raw p    | Holm p   | FDR      |
|------------------------------------------|------------|------|-------------|------------|----------|----------|----------|
| Thyroid hormone synthesis                | 13         | 1    | 10.256      | 0.52632    | 6.29E-06 | 0.000604 | 0.000388 |
| Catecholamine Biosynthesis               | 20         | 3    | 7.5306      | 0.52632    | 8.07E-06 | 0.000767 | 0.000388 |
| Pyruvate Metabolism                      | 48         | 11   | 2.9013      | 0.52632    | 3.54E-05 | 0.003327 | 0.001133 |
| Tyrosine Metabolism                      | 72         | 16   | 1.9207      | 0.52632    | 0.00017  | 0.015808 | 0.003381 |
| Phenylalanine and Tyrosine Metabolism    | 28         | 9    | 3.0289      | 0.52632    | 0.000194 | 0.017829 | 0.003381 |
| Gluconeogenesis                          | 35         | 11   | 2.1448      | 0.52632    | 0.000211 | 0.019228 | 0.003381 |
| Warburg Effect                           | 58         | 17   | 1.6491      | 0.52632    | 0.000703 | 0.063235 | 0.006898 |
| Androgen and Estrogen Metabolism         | 33         | 3    | 4.8509      | 0.52632    | 0.000722 | 0.064251 | 0.006898 |
| Androstenedione Metabolism               | 24         | 3    | 4.8509      | 0.52632    | 0.000722 | 0.064251 | 0.006898 |
| Steroid Biosynthesis                     | 48         | 2    | 5.1195      | 0.52632    | 0.000814 | 0.070824 | 0.006898 |
| Pterine Biosynthesis                     | 29         | 3    | 4.2018      | 0.52632    | 0.000851 | 0.073204 | 0.006898 |
| Tryptophan Metabolism                    | 60         | 19   | 1.7065      | 0.52632    | 0.000862 | 0.073294 | 0.006898 |
| Folate Metabolism                        | 29         | 4    | 3.4721      | 0.52632    | 0.001249 | 0.10494  | 0.009    |
| Threonine and 2-Oxobutanoate Degradation | 20         | 4    | 3.2252      | 0.52632    | 0.001313 | 0.10893  | 0.009    |
| Lysine Degradation                       | 30         | 6    | 2.254       | 0.52632    | 0.00307  | 0.2517   | 0.019645 |
| Glycerolipid Metabolism                  | 25         | 4    | 2.5627      | 0.52632    | 0.004524 | 0.36647  | 0.027146 |
| Glycine and Serine Metabolism            | 59         | 24   | 1.4655      | 0.52632    | 0.005786 | 0.46287  | 0.032673 |
| Vitamin B6 Metabolism                    | 20         | 2    | 2.3409      | 0.52632    | 0.014039 | 1        | 0.074874 |
| Nicotinate and Nicotinamide Metabolism   | 37         | 9    | 1.403       | 0.52632    | 0.023947 | 1        | 0.121    |
| Cysteine Metabolism                      | 26         | 7    | 1.5637      | 0.52632    | 0.029509 | 1        | 0.14164  |
| Amino Sugar Metabolism                   | 33         | 8    | 1.1987      | 0.52632    | 0.037498 | 1        | 0.17142  |
| Arachidonic Acid Metabolism              | 69         | 2    | 1.8317      | 0.52632    | 0.049112 | 1        | 0.20527  |
| Pantothenate and CoA Biosynthesis        | 21         | 4    | 1.5395      | 0.52632    | 0.049389 | 1        | 0.20527  |

Table S6. Detected metabolic pathways and fecal related diseases.

|                                                          | Total<br>Cmpd | Hits | Statistic<br>Q | Expected<br>Q | Raw p    | Holm p   | FDR      |
|----------------------------------------------------------|---------------|------|----------------|---------------|----------|----------|----------|
| Ccd                                                      | 17            | 5    | 4.0642         | 0.52632       | 6.38E-06 | 0.000242 | 0.000242 |
| Ileal Crohn's Disease                                    | 19            | 6    | 3.437          | 0.52632       | 1.40E-05 | 0.000516 | 0.000265 |
| Irritable Bowel Syndrome                                 | 186           | 110  | 1.796          | 0.52632       | 6.01E-05 | 0.002164 | 0.000761 |
| Genetically At-risk Of<br>Celiac Disease                 | 5             | 5    | 3.0775         | 0.52632       | 0.000115 | 0.004017 | 0.000906 |
| Myalgic<br>Encephalomyelitis/chronic<br>Fatigue Syndrome | 22            | 21   | 2.3309         | 0.52632       | 0.000119 | 0.004053 | 0.000906 |
| Ulcerative Colitis                                       | 609           | 202  | 1.279          | 0.52632       | 0.000252 | 0.00833  | 0.001599 |
| Colorectal Cancer                                        | 1653          | 374  | 1.0738         | 0.52632       | 0.000684 | 0.0219   | 0.003715 |
| Cryptosporidium Infection                                | 29            | 19   | 1.6033         | 0.52632       | 0.000792 | 0.024552 | 0.003762 |
| Crohn's Disease                                          | 522           | 216  | 1.2162         | 0.52632       | 0.001229 | 0.036855 | 0.004794 |
| Unclassified Ibd                                         | 84            | 58   | 1.292          | 0.52632       | 0.001262 | 0.036855 | 0.004794 |
| Autism                                                   | 204           | 54   | 1.4493         | 0.52632       | 0.005077 | 0.14215  | 0.017537 |
| Iron Deficiency                                          | 50            | 4    | 2.5774         | 0.52632       | 0.008974 | 0.2423   | 0.028418 |
| Ankylosing Spondylitis                                   | 21            | 20   | 1.2335         | 0.52632       | 0.010693 | 0.27801  | 0.029023 |
| Rheumatoid Arthritis                                     | 42            | 40   | 1.2335         | 0.52632       | 0.010693 | 0.27801  | 0.029023 |
| Obesity                                                  | 14            | 6    | 1.8613         | 0.52632       | 0.016567 | 0.39761  | 0.04197  |

Table S7. The statistical significance in calculated diversity indices.

| Diversity index | p               | t             |
|-----------------|-----------------|---------------|
| ace             | <b>1.20E-15</b> | <b>11.092</b> |
| bergerparker    | <b>1.10E-20</b> | <b>14.695</b> |
| boneh           | <b>5.10E-21</b> | <b>14.948</b> |
| bstick          | <b>2.60E-19</b> | <b>13.695</b> |
| chao            | <b>2.10E-24</b> | <b>17.721</b> |
| coverage        | <b>1.40E-81</b> | <b>209.94</b> |
| efron           | <b>1.60E-04</b> | <b>4.0592</b> |
| geometric       | <b>2.42E-18</b> | <b>12.952</b> |
| goodscoverage   | <b>1.40E-81</b> | <b>209.94</b> |
| heip            | <b>2.88E-35</b> | <b>29.331</b> |
| invsimpson      | <b>3.93E-24</b> | <b>17.491</b> |
| jackknife       | 1.32E-01        | 1.528         |
| logseries       | <b>4.99E-25</b> | <b>18.276</b> |
| shannon         | <b>1.01E-43</b> | <b>42.45</b>  |
| shannoneven     | <b>4.05E-52</b> | <b>60.785</b> |
| simpson         | <b>9.76E-20</b> | <b>13.971</b> |
| simpsoneven     | <b>4.18E-30</b> | <b>23.227</b> |
| smithwilson     | <b>7.49E-24</b> | <b>17.252</b> |
| sobs            | <b>2.50E-37</b> | <b>32.133</b> |

Table S8. Matching metabolites identified in fecal samples by  $^1\text{H}$ -NMR and predicted by MelonPan.

| Matching<br>metabolites |
|-------------------------|
| azelate                 |
| cholate                 |
| citrulline              |
| creatine                |
| glutamate               |
| hypoxanthine            |
| inosine                 |
| malonate                |
| nicotinate              |
| pantothenate            |
| phenylacetate           |
| propionate              |
| sebacate                |
| taurine                 |
| thymine                 |
| uracil                  |
| xanthine                |

## References

1. Debevec, T.; Pialoux, V.; Millet, G.P.; Martin, A.; Mramor, M.; Osredkar, D. Exercise Overrides Blunted Hypoxic Ventilatory Response in Prematurely Born Men. *Frontiers in physiology* **2019**, *10*, doi:10.3389/fphys.2019.00437.
2. Martin, A.; Millet, G.; Osredkar, D.; Mramor, M.; Faes, C.; Gouraud, E.; Debevec, T.; Pialoux, V. Effect of pre-term birth on oxidative stress responses to normoxic and hypoxic exercise. *Redox biology* **2020**, *32*, doi:10.1016/j.redox.2020.101497.
